# Supplementary material for: Electromagnetic Property Modulation of Flaky Ferromagnetic 304 Stainless-Steel Powders for Microwave Absorption at Elevated Temperatures
Source: MDPI journal article supplement (doi:10.3390/magnetochemistry9090208), 2023-09-05
Supplement: s1 [file s1]

# Electromagnetic Property Modulation of Flaky Ferromagnetic 304 Stainless-Steel Powders for Microwave Absorption at Elevated Temperatures

Bolin Yang <sup>1</sup>, Yifan Xu <sup>2</sup>, Zhihong Chen <sup>3,\*</sup>, Hang Yang <sup>1</sup>, Yuchen Hu <sup>3</sup>, Haoqin Wu <sup>4</sup>, Mingfeng Xing <sup>1</sup>, Jianguo Guan <sup>2</sup> and Wei Li <sup>5,\*</sup>

<sup>1</sup> School of Materials Science and Engineering, Wuhan University of Technology, Wuhan 430070, China; 308481@whut.edu.cn (B.Y.); 308483@whut.edu.cn (H.Y.); xingmf@whut.edu.cn (M.X.)

<sup>2</sup> School of Materials and Microelectronics, Wuhan University of Technology, Wuhan 430070, China; 268690@whut.edu.cn (Y.X.); guanjq@whut.edu.cn (J.G.)

<sup>3</sup> School of Science, Wuhan University of Technology, Wuhan 430070, China; hyc349152@whut.edu.cn

<sup>4</sup> Leicester International Institute, Dalian University of Technology, Dalian 116024, China; whq17872999616@mail.dlut.edu.cn

<sup>5</sup> State Key Laboratory of Advanced Technology for Materials Synthesis and Processing, Wuhan University of Technology, Wuhan 430070, China

\* Correspondence: z\_chen@whut.edu.cn (Z.C.); wellee@whut.edu.cn (W.L.)

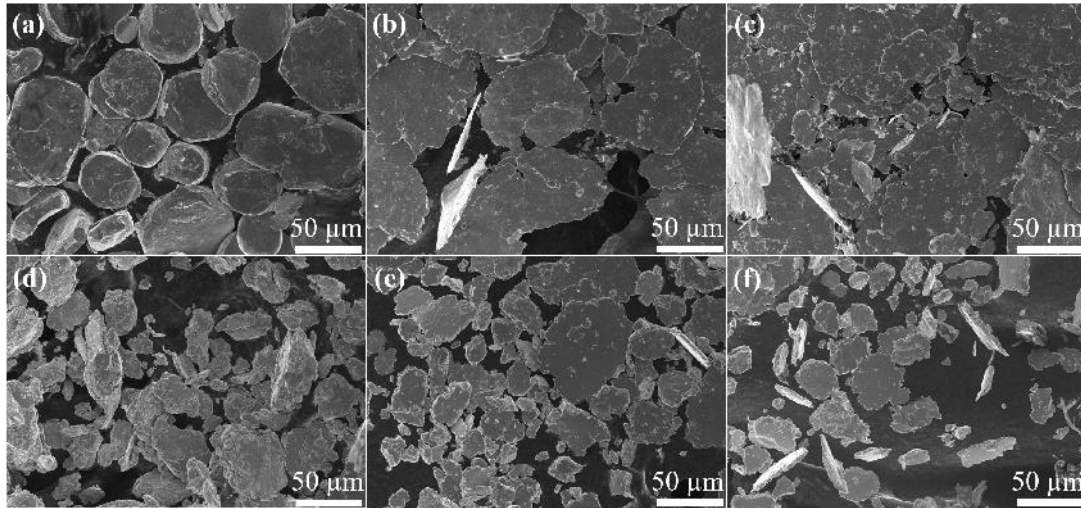

Figure S1. (a-f) SEM images of 304 stainless steel powders after ball milling for 0,2,6,12,20,30 and 40 h

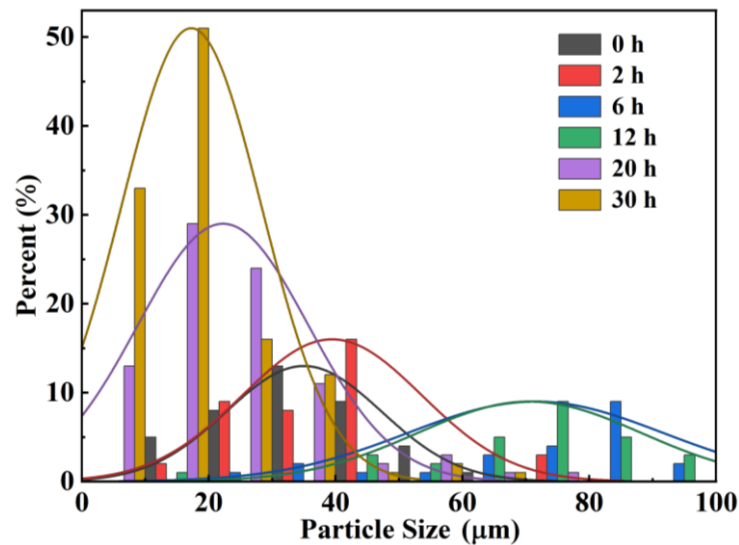

Figure S2. Particle size distribution of 304 stainless steel powders during ball milling

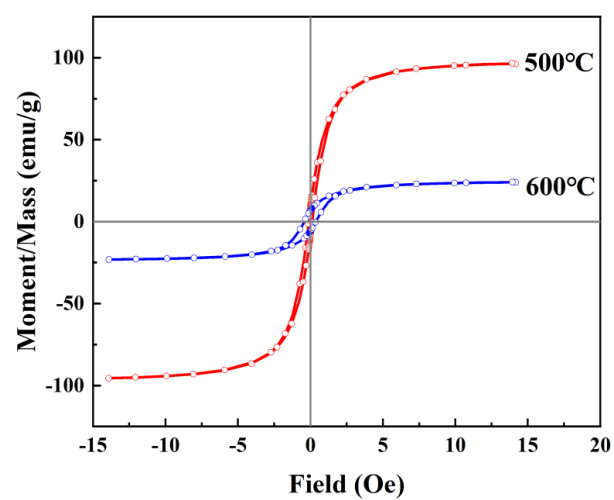

Figure S3. Hysteresis loop of air after heat treatment at 500°C and 600°C for 1 h

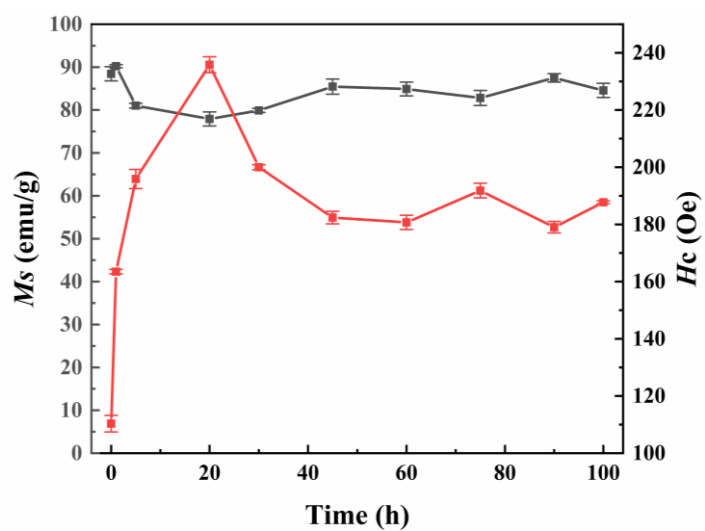

Figure S4. The changes of  $M_s$  and  $H_c$  after heat treatment at 500°C for different time

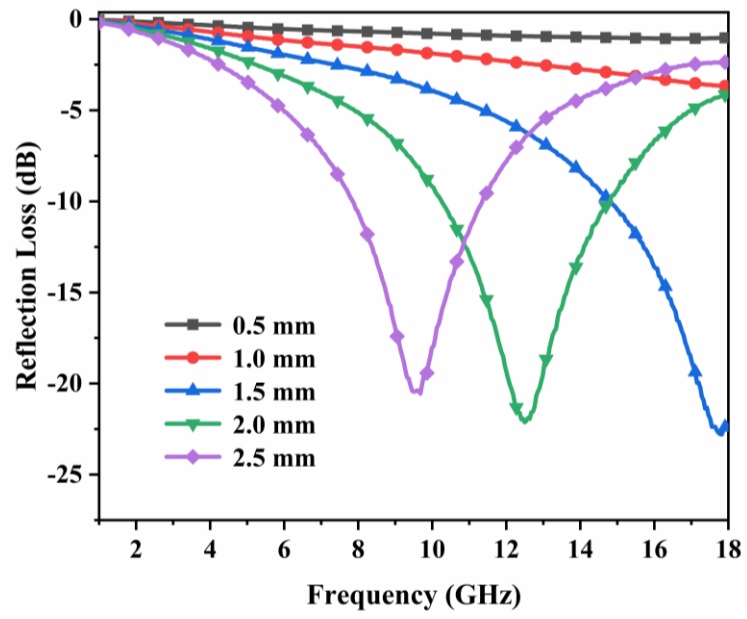

Figure S5. Simulated reflection loss after heat treatment at 500°C for 100h
