# Supplementary material for: Electromagnetic Property Modulation of Flaky Ferromagnetic 304 Stainless-Steel Powders for Microwave Absorption at Elevated Temperatures
Source: MDPI journal article supplement (doi:10.3390/magnetochemistry9090208), 2023-09-05
Supplement: s1 [file s1]

Archive with 1 entries (1 files):
- magnetochemistry-2569809-supplementary.pdf
